# Supplementary material for: Biological Effect of Organically CoatedGrias neuberthiiandPersea americanaSilver Nanoparticles on HeLa and MCF-7 Cancer Cell Lines
Source: Hindawi journal article supplement (doi:10.1155/2018/9689131), 2018-08-01
Supplement: f1 [file 9689131.f1.docx]

**Supplementary data**

(a)

(b)

(c)

Figure 1. UV-visible spectra of (a) piton AgNPs in culture medium incubated with HeLa cells, (b) piton AgNPs in culture medium, and (c) piton AgNPs diluted in distilled water.

(a)

(b)

(c)

Figure 2. UV-visible spectra of (a) avocado AgNPs in culture medium incubated with HeLa cells, (b) avocado AgNPs in culture medium, and (c) avocado AgNPs diluted in distilled water.

(a)

(b)

(c)

Figure 3. UV-visible spectra of (a) piton AgNPs in culture medium incubated with MCF7 cells, (b) piton AgNPs in culture medium, and (c) piton AgNPs diluted in distilled water.

(a)

(b)

(c)

Figure 4. UV-visible spectra of (a) avocado AgNPs in culture medium incubated with MCF7 cells, (b) avocado AgNPs in culture medium, and (c) avocado AgNPs diluted in distilled water.
